# Supplementary material for: Effect of Yerba Mate and Silk Fibroin Nanoparticles on the Migration Properties in Ethanolic Food Simulants and Composting Disintegrability of Recycled PLA Nanocomposites
Source: MDPI journal article supplement (doi:10.3390/polym13121925), 2021-06-10
Supplement: s1 [file s1]

## Supporting Information

# Effect of Yerba Mate and Silk Fibroin Nanoparticles on the Migration Properties in Ethanolic Food Simulants and Composting Disintegrability of Recycled PLA Nanocomposites

Freddys R. Beltrán <sup>1,2</sup>, Marina P. Arrieta <sup>1,2,\*</sup>, Diego Elena Antón <sup>1</sup>, Antonio A. Lozano-Pérez <sup>3</sup>, José L. Cenis <sup>3</sup>, Gerald Gaspar <sup>1,2</sup>, María U. de la Orden <sup>2,4</sup> and Joaquín Martínez Urreaga <sup>1,2</sup>

<sup>1</sup> Departamento de Ingeniería Química Industrial y Medio Ambiente, Universidad Politécnica de Madrid, E.T.S.I. Industriales, 28006 Madrid, Spain; f.beltran@upm.es (F.R.B.); d.elena@alumnos.upm.es (D.E.A.); geraldmanuel.gaspar@upm.es (G.G.); joaquin.martinez@upm.es (J.M.U.)

<sup>2</sup> Grupo de Investigación Polímeros Caracterización y Aplicaciones (POLCA), Madrid, Spain; mariula@ucm.es

<sup>3</sup> Departamento de Biotecnología, Genómica y Mejora Vegetal, Instituto Murciano de Investigación y Desarrollo Agrario y Alimentario (IMIDA), 30150 Murcia, Spain; abel@um.es, abel@um.es (A.A.L.-P.); josel.cenis@carm.es (J.L.C.)

<sup>4</sup> Departamento de Química Orgánica, Facultad de Óptica y Optometría, Universidad Complutense de Madrid, 28037 Madrid, Spain

\* Correspondence: m.arrieta@upm.es; Tel.: +34-910-677-301

## Instrumental

The hydrodynamic size of either SFN or YMN was measured by means of dynamic light scattering (DLS). The obtained particles, in the powder form, were dispersed at 1 mg·mL<sup>-1</sup> in ultrapure deionized water by ultrasonication at 10% of amplitude for 1 minute with a Branson SFX550 (Emmerson Ultrasonic Corporation, Dansbury, USA) and further measured at 20 °C in a Zetasizer Nano series ZSP equipment (Malvern Instrument Ltd., Malvern, UK).

Transmission electron microscopy (TEM) measurements of SFN and YMN were carried out on a Zeiss EM902 (Zeiss, Oberkochen, Germany) and a JEOL JEM-1010 (JEOL Ltd., Tokyo, Japan) operating at 100kV, respectively. YMN suspension was prepared by dissolving 1 mg of YMN powder into 1 mL of water. One droplet of YMN suspension (1 mg mL<sup>-1</sup>) was deposited on carbon-coated copper grids and dried at room temperature during 25 min before TEM observation.

The cryo-fractured surface microstructure of the cross section of films was observed by means of field emission scanning electron microscopy (FE-SEM). Films were previously sputtered with a palladium/gold layer. PLAV, PLAR and PLA-YMN were observed in a JEOL JSM 7600F microscope (JEOL Ltd., Tokyo, Japan) operating at 5 kV and nanocomposite of PLAR loaded with 2% SFN was observed in a FE-SEM S8000 (Hitachi, Tokyo, Japan) at 20kV

## Results

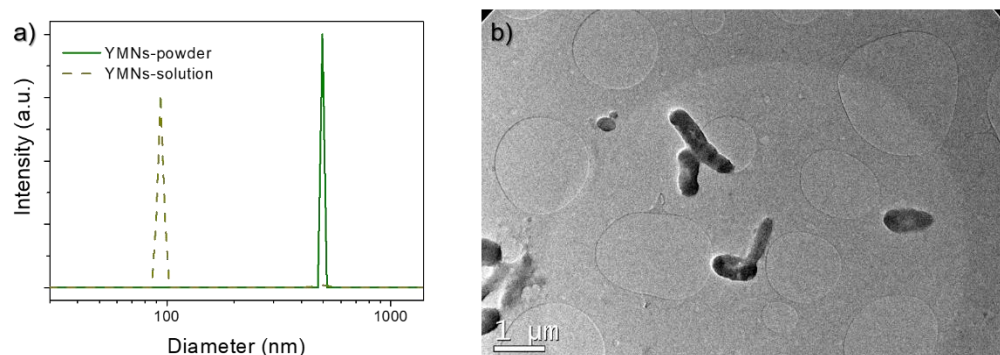

**Figure S1.** (a) DLS measurements of YMN solution and powder and (b) TEM image of YMN powder.

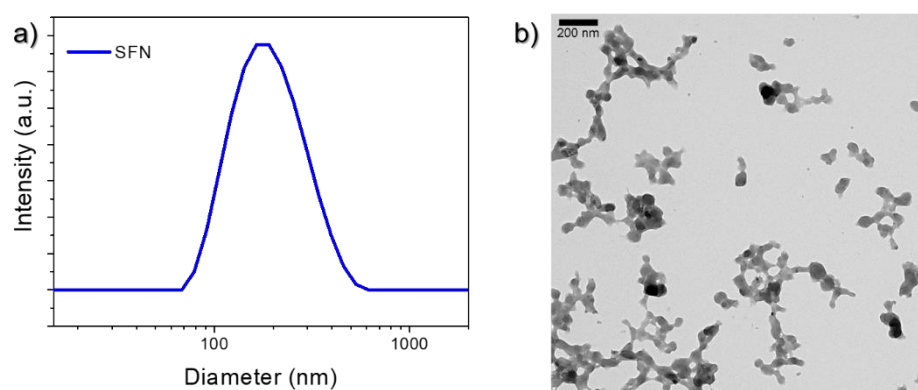

**Figure S2.** (a) DLS measurements of SFNs and (b) TEM image of SFNs powder.

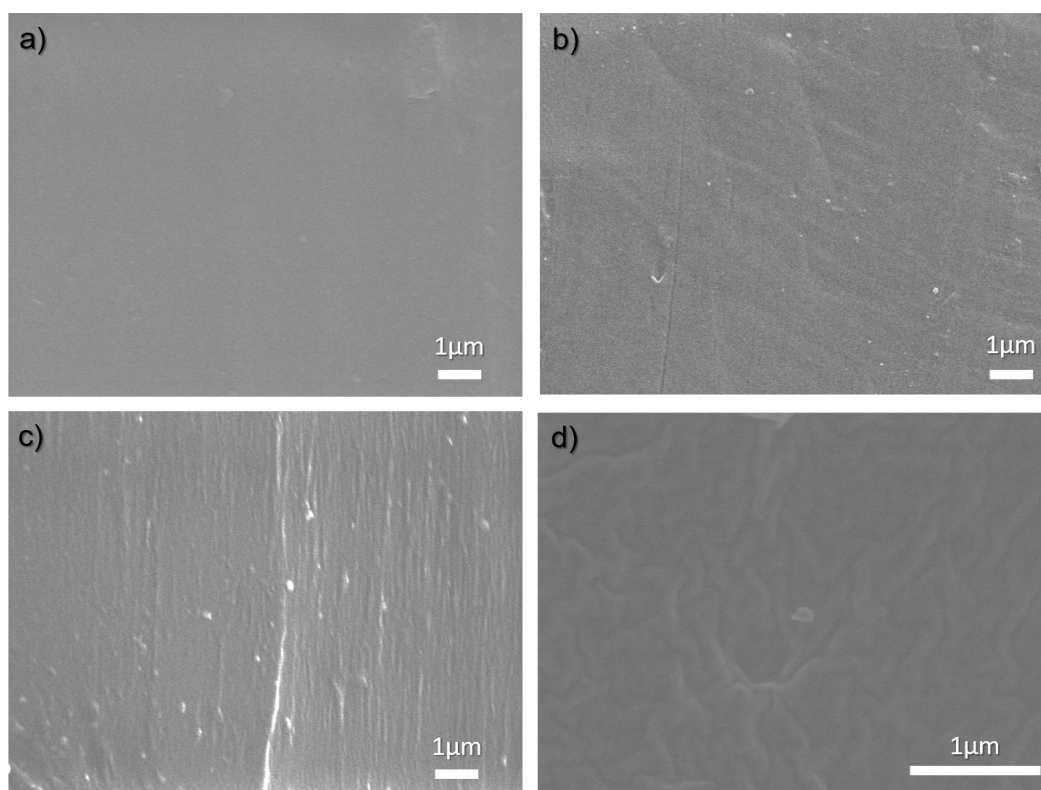

**Figure S3.** FE-SEM images of: PLAV (a), PLAR (b), and nanocomposites: PLAR loaded with 1% wt. of YMN (c) and PLAR loaded with 2% wt. of SFN (d).
